# Supplementary material for: Plant Defensive β-Glucosidases Resist Digestion and Sustain Activity in the Gut of a Lepidopteran Herbivore
Source: PubMed Central journal article supplement (PMC6186830; doi:10.3389/fpls.2018.01389), 2018-10-08
Supplement: Table_1.pdf [file Table_1.pdf]

| <b>Protein Identifier</b> | <b>Predicted function</b> | <b># Matched peptides</b> | <b>% Sequence coverage</b> | <b>Expression top leaf (V3)</b> |
|---------------------------|---------------------------|---------------------------|----------------------------|---------------------------------|
| GRMZM2G064159             | Agmatine deiminase        | 7                         | 20,5                       | 7960,78                         |
| GRMZM2G374302             | Arginine decarboxylase    | 13                        | 34,0                       | 549,51                          |
| GRMZM2G172204             | BGAF1                     | 6                         | 41,8                       | not found                       |
| GRMZM2G453805             | Chitinase                 | 4                         | 8,8                        | 1609,16                         |
| GRMZM2G016890             | Glycosyl hydrolase ZmGlu1 | 7                         | 15                         | 9805,84                         |
| GRMZM2G172369             | Glycosyl hydrolase        | 16                        | 21,9                       | 8638,92                         |
| GRMZM2G147687             | Glycosyl hydrolase        | 8                         | 20,1                       | 44620,73                        |
| GRMZM2G080839             | Oxidoreductase            | 6                         | 22,0                       | 287,74                          |
| GRMZM2G084279             | Oxidoreductase            | 5                         | 31,7                       | 15951,26                        |
| GRMZM2G163749             | Peptidase                 | 5                         | 11,0                       | 1402,54                         |
| GRMZM2G448001             | Peptidase                 | 7                         | 18,1                       | 722,19                          |
| GRMZM2G031572             | Peptidase                 | 6                         | 19,1                       | 11423,93                        |
| GRMZM2G126261             | Peroxidase                | 5                         | 28,8                       | 3290,47                         |
| GRMZM2G135108             | Peroxidase                | 6                         | 20,0                       | 495,63                          |
| GRMZM2G450233             | Peroxidase                | 7                         | 23,0                       | 1583,12                         |
